# Supplementary material
Source: Springer Nature journal article supplement (https://www.springermedizin.de/resource/supplementary/13063_2012_1098_MOESM6_ESM.pdf/9619700)
Supplement: MOESM6 [file 9619700]

Question introduction: Please tell me if your husband/partner/most recent partner, or any other partner, has ever done the following things to you: (with a following question about whether each has occurred in the past 12 months)

*(Physical IPV items)*

- a) Slapped you or thrown something at you that could hurt you?
- b) Pushed you or shoved you or pulled your hair?
- c) Hit you with his fist or with something else that could hurt you?
- d) Kicked you, dragged you or beat you up?
- e) Choked you or burnt you on purpose?
- f) Threatened to use or actually used a gun, knife or other weapon against you?
- g) Threatened to use or actually used a panga against you?

*(Sexual IPV items)*

- a) Forced you to have sexual intercourse by physically threatening you, holding you down or hurting you in some way?
- b) Did you ever have sexual intercourse because you were intimidated by him or afraid he would hurt you?
